# Supplementary material
Source: Copernicus journal article supplement (doi:10.5194/egusphere-2026-2494)
Supplement: Supplementary file 1 [file egusphere-2026-2494-supplement.pdf]

*Supplement of*

**Influence of irradiance and mixing layer height on the vertical trace matter distribution in the lower planetary boundary layer – drone-based investigation**

5 Lasse Moormann<sup>1</sup>, Friederike Fachinger<sup>1</sup>, Holger Tost<sup>2</sup>, Frank Drewnick<sup>1</sup>

<sup>1</sup>Multiphase Chemistry Department, Max Planck Institute for Chemistry, Mainz, 55128, Germany

<sup>2</sup>Institute for Atmospheric Physics, Johannes Gutenberg University, Mainz, 55128, Germany

*Correspondence to:* Frank Drewnick (frank.drewnick@mpic.de)

Table S1: Instruments used for characterization of the lower troposphere.

| Instrument                                                                                                                                                                                                                                                                                                                                                                                                                                                                                                      | Measured variables                                                                                                                                                   | Time resolution |
|-----------------------------------------------------------------------------------------------------------------------------------------------------------------------------------------------------------------------------------------------------------------------------------------------------------------------------------------------------------------------------------------------------------------------------------------------------------------------------------------------------------------|----------------------------------------------------------------------------------------------------------------------------------------------------------------------|-----------------|
| <b>MoLa (Drewnick et al., 2012)</b>                                                                                                                                                                                                                                                                                                                                                                                                                                                                             |                                                                                                                                                                      |                 |
| <b>CPC<sup>a</sup></b>                                                                                                                                                                                                                                                                                                                                                                                                                                                                                          | Particle number concentration (> 2.5 nm)                                                                                                                             | 1 s             |
| <b>EDM<sup>b</sup></b>                                                                                                                                                                                                                                                                                                                                                                                                                                                                                          | Particulate matter PM <sub>1</sub>                                                                                                                                   | 6 s             |
| <b>FMPS<sup>c</sup></b>                                                                                                                                                                                                                                                                                                                                                                                                                                                                                         | Particle size distribution (5.6 to 560 nm) based on electrical mobility diameter                                                                                     | 1 s             |
| <b>Meteorological station<sup>d</sup></b>                                                                                                                                                                                                                                                                                                                                                                                                                                                                       | Wind direction, wind speed, relative humidity, temperature, rain intensity, pressure                                                                                 | 1 s             |
| <b>OPC<sup>e</sup></b>                                                                                                                                                                                                                                                                                                                                                                                                                                                                                          | Particle size distribution (0.25 to 32 µm) based on optical diameter                                                                                                 | 6 s             |
| <b>O<sub>3</sub>-monitor<sup>f</sup></b>                                                                                                                                                                                                                                                                                                                                                                                                                                                                        | Mixing ratio of O <sub>3</sub>                                                                                                                                       | 2 s             |
| <b>Pyranometer<sup>g</sup></b>                                                                                                                                                                                                                                                                                                                                                                                                                                                                                  | Solar irradiance                                                                                                                                                     | 1 s             |
| <sup>a</sup> Condensation Particle Counter Model 3786, TSI, Inc., USA. <sup>b</sup> Environmental Dust Monitor EDM180, Grimm Aerosoltechnik, Germany. <sup>c</sup> Fast Mobility Particle Sizer Model 3091, TSI, Inc., USA. <sup>d</sup> WXT520, Vaisala Oyj, Finland. <sup>e</sup> Optical Particle Counter Model 1.109, Grimm Aerosoltechnik GmbH, Germany. <sup>f</sup> Monitor 205 Dual Beam Ozone Monitor, 2B Technologies, Inc., USA. <sup>g</sup> CMP3 Pyranometer Sensor, Campbell Scientific Inc., UK. |                                                                                                                                                                      |                 |
| <b>FLab (Moormann et al., 2025)</b>                                                                                                                                                                                                                                                                                                                                                                                                                                                                             |                                                                                                                                                                      |                 |
| <b>Anemometer<sup>h</sup></b>                                                                                                                                                                                                                                                                                                                                                                                                                                                                                   | Horizontal wind speed and direction; temperature; relative humidity; pressure                                                                                        | 1 s             |
| <b>CPC<sup>i</sup></b>                                                                                                                                                                                                                                                                                                                                                                                                                                                                                          | Particle number concentration (> 10 nm)                                                                                                                              | 1 s             |
| <b>CBO<sup>j</sup></b>                                                                                                                                                                                                                                                                                                                                                                                                                                                                                          | Mixing ratio of CO <sub>2</sub>                                                                                                                                      | 2 s             |
| <b>OPC<sup>k</sup></b>                                                                                                                                                                                                                                                                                                                                                                                                                                                                                          | Particle size distribution (0.350 to 40 µm) based on optical diameter; temperature; relative humidity                                                                | 1 s             |
| <b>O<sub>3</sub>-monitor<sup>l</sup></b>                                                                                                                                                                                                                                                                                                                                                                                                                                                                        | Mixing ratio of O <sub>3</sub>                                                                                                                                       | 2 s             |
| <b>UAS: Matrice 600<sup>m</sup></b>                                                                                                                                                                                                                                                                                                                                                                                                                                                                             | 3D orientation; 3D flight velocity; GPS position; wind speed and direction; altitude based on pressure level and GPS; propeller rotation rate; various internal data | ≤1 s            |
| <sup>h</sup> TriSonica™ Mini, Anemoment LLC, USA. <sup>i</sup> Condensation Particle Counter Model 3007, TSI, Inc., USA. <sup>j</sup> CARBOCAP® Carbon Dioxide Probe GMP343, Vaisala Oyj, Finland. <sup>k</sup> OPC-N3, Alphasense AMETEK®, United Kingdom. <sup>l</sup> Model 205 Dual Beam Ozone Monitor, 2B Technologies, Inc., USA. <sup>m</sup> Matrice 600, SZ DJI Technology Co., Ltd., China.                                                                                                           |                                                                                                                                                                      |                 |
| <b>Flux tower</b>                                                                                                                                                                                                                                                                                                                                                                                                                                                                                               |                                                                                                                                                                      |                 |
| <b>Ultra-sonic anemometer<sup>n</sup></b>                                                                                                                                                                                                                                                                                                                                                                                                                                                                       | 3D wind direction, humidity, temperature                                                                                                                             | 0.05 s          |
| <sup>n</sup> CSAT3B 3-D Sonic Anemometer, Campbell Scientific, Inc., Logan, Utah, USA.                                                                                                                                                                                                                                                                                                                                                                                                                          |                                                                                                                                                                      |                 |

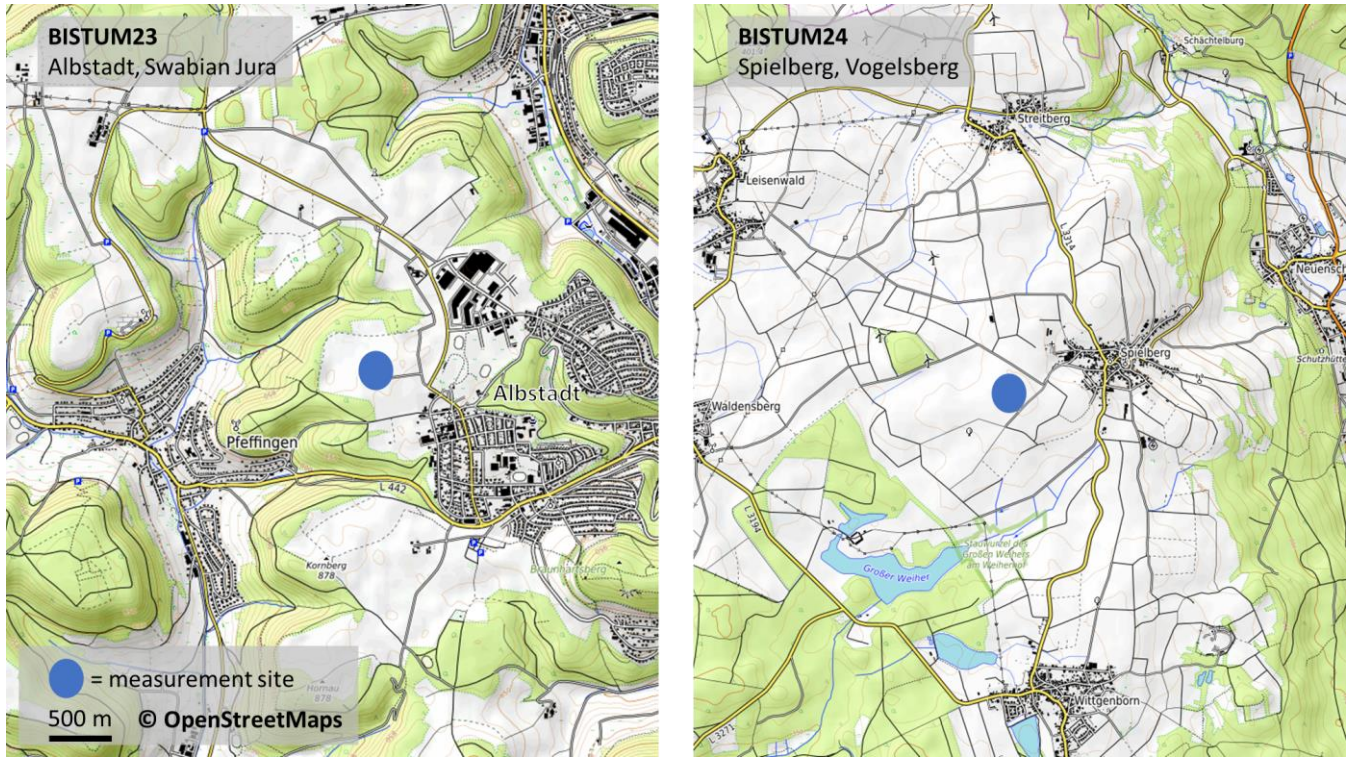

Figure S1: Topographic maps of the rural measurement sites during BISTUM23 and BISTUM24.

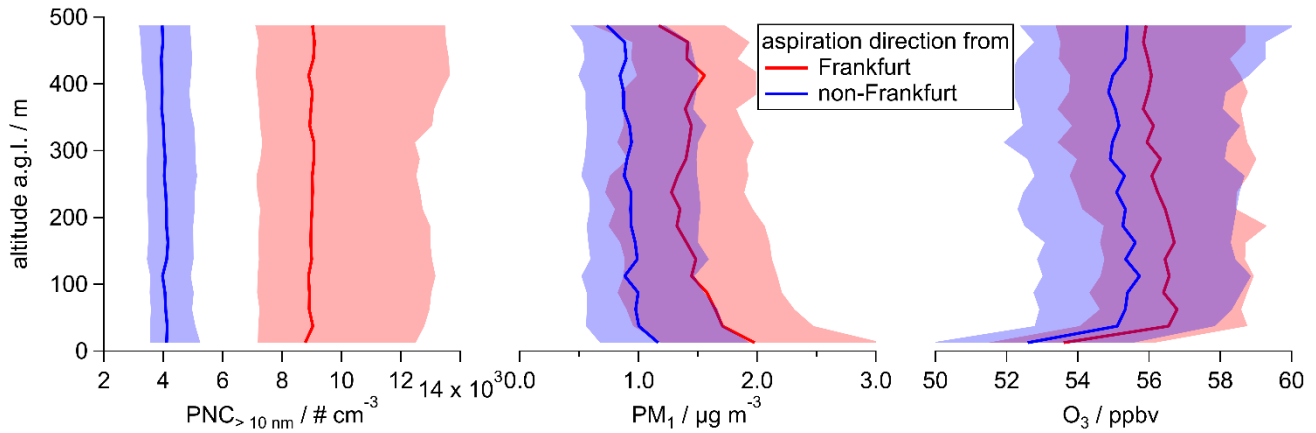

20 Figure S2: Median vertical profiles of anthropogenic tracers for air masses passing the Frankfurt-Rhine-Main metropolitan area (red) and only rural areas (blue): during BISTUM24 the particle number concentration (a), the  $PM_1$  mass concentration (b) and  $O_3$  mixing ratio (c). Shaded areas represent the respective interquartile ranges.

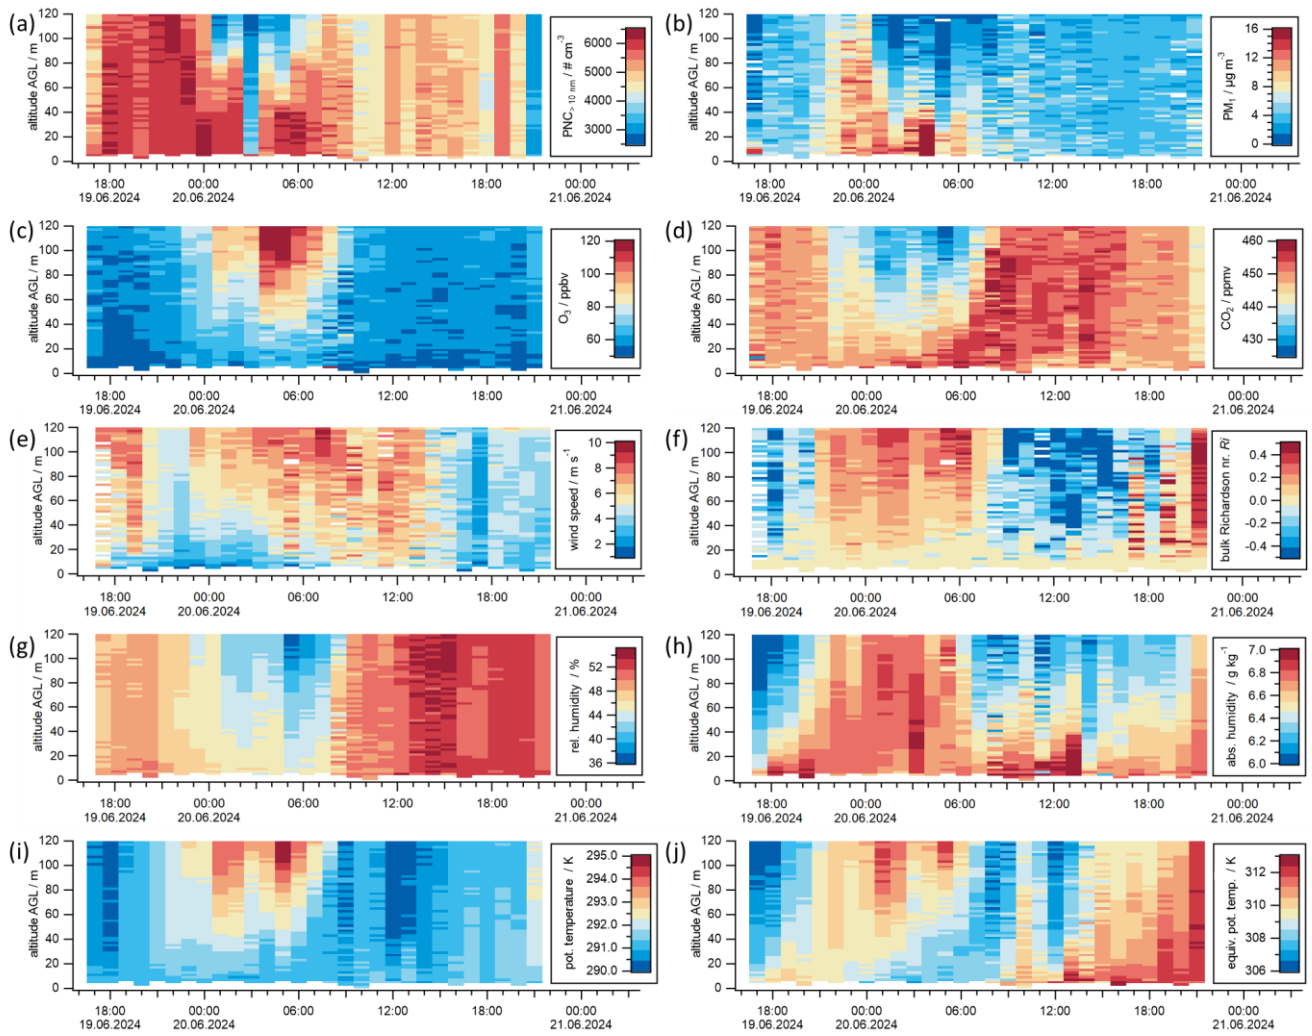

**Figure S3:** Hourly high-resolution (2 m bins) vertical profiles throughout a full day and night during BISTUM24, including: the particle number concentration measured with the CPC ( $\text{PNC}_{>10 \text{ nm}}$ ) (a),  $\text{PM}_{10}$  (b),  $\text{O}_3$  (c),  $\text{CO}_2$  (d), wind speed (e), bulk Richardson number (f), relative and absolute humidity (g and h), and potential and equivalent potential temperature (i and j).

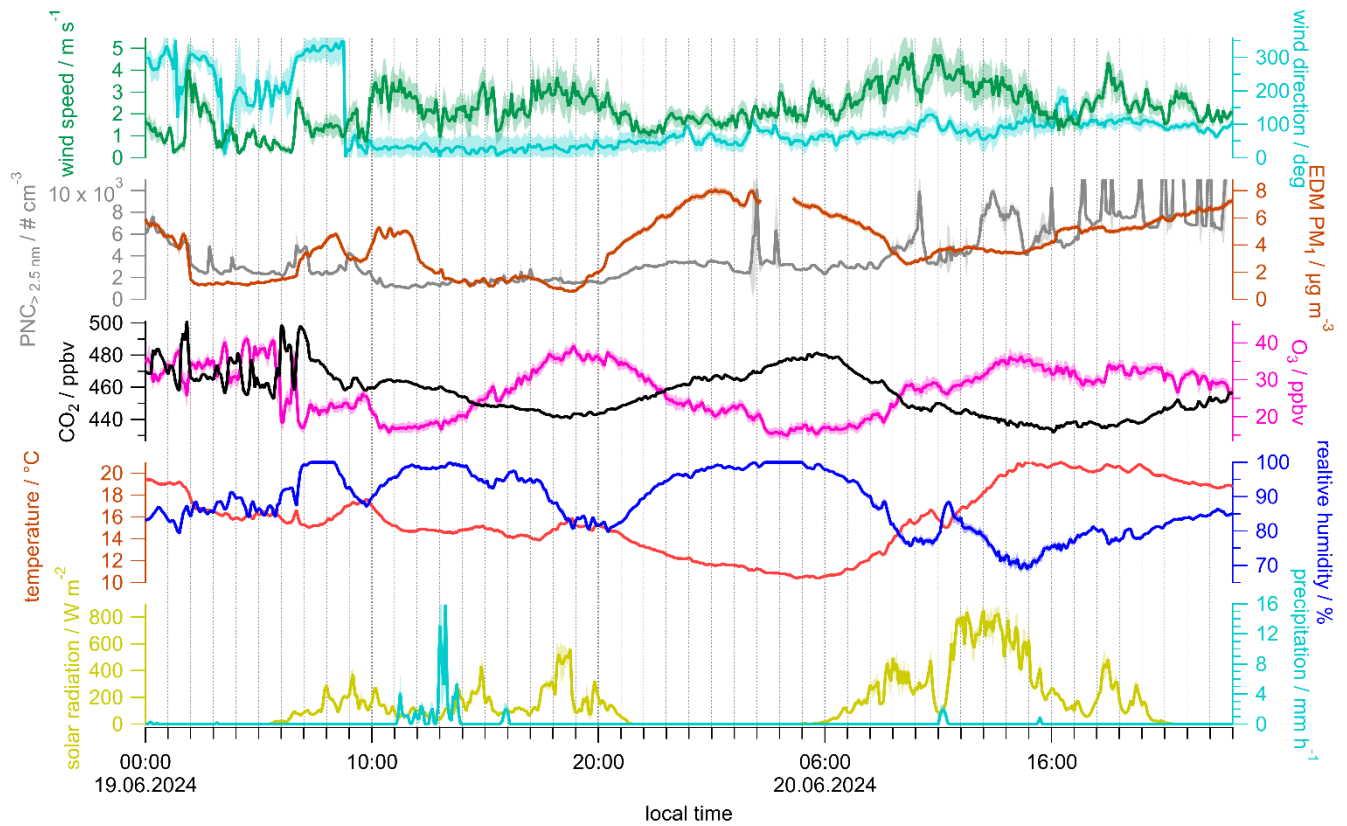

**Figure S4:** Ground-based measurements on June 19 to June 21, 2024 show low solar irradiation on June 19 and fog between 03:00 and 05:00 on June 20 that led to an increase of the measured PM<sub>1</sub> (dried, orange) and particle number concentration (grey), but a strong reduction of O<sub>3</sub> (pink), while air temperature (red), wind (green and turquoise) and CO<sub>2</sub> (black) appear unchanged.

30

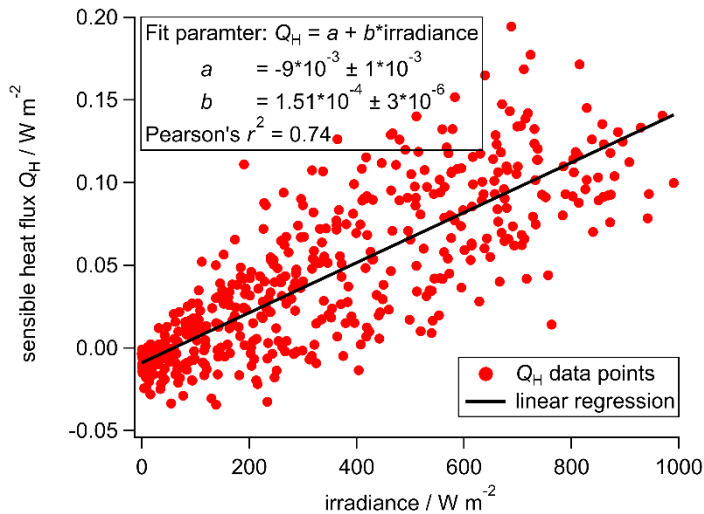

**Figure S5:** The sensible heat flux plotted versus solar irradiance during BISTUM24 show a good correlation (Pearson's  $r^2 = 0.74$ ).

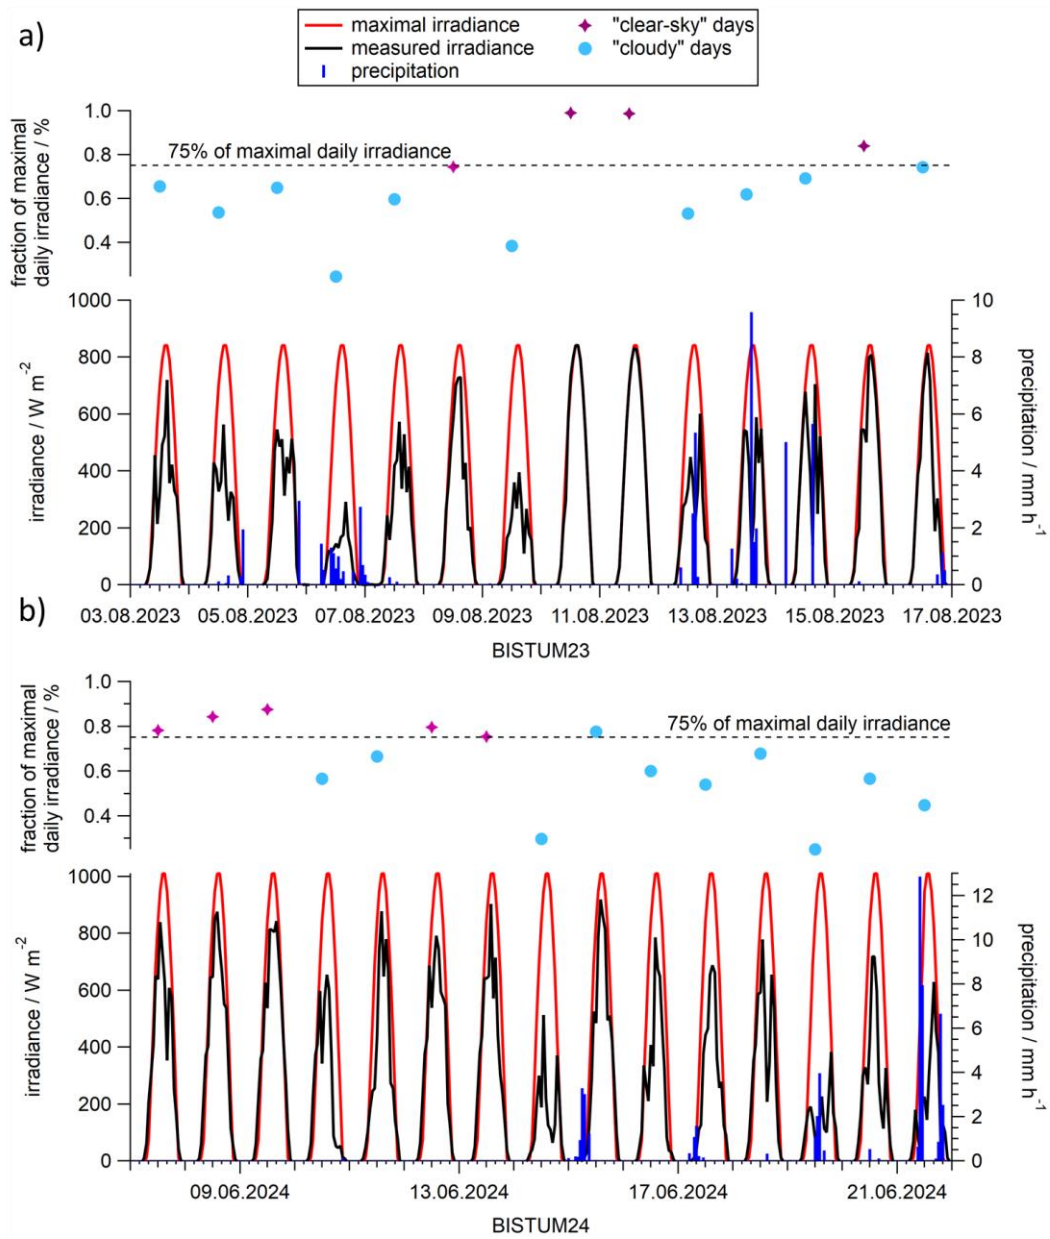

35 **Figure S6:** “Clear-sky” days (violet markers) and “cloudy” days (bluish markers) were classified by the criteria whether more or less than 75% of maximal daily possible irradiance (red traces) were measured (black traces) integrated throughout a day, respectively, and that precipitation (blue) was less/more than 5 mm day<sup>-1</sup>. The classification of individual days is displayed for BISTUM23 (a) and BISTUM24 (b).

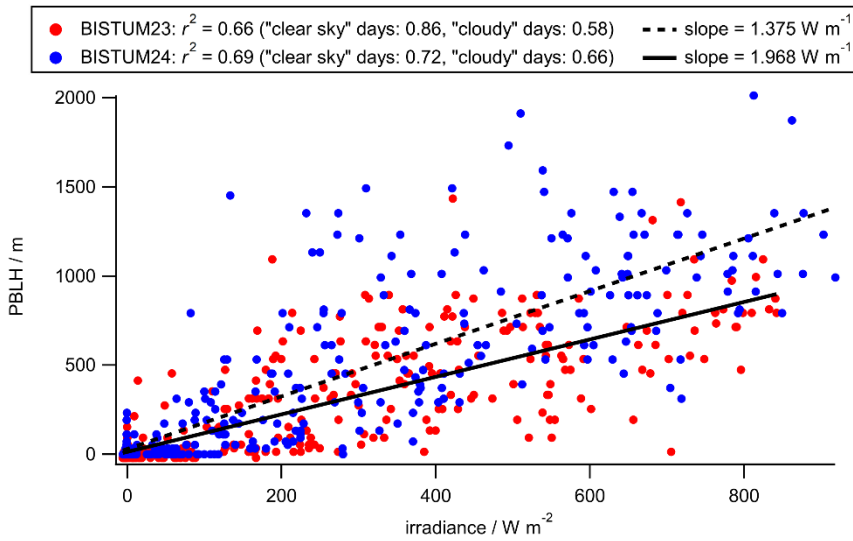

**Figure S7:** The modeled planetary boundary layer height (PBLH) versus the irradiance show a linear relationship for BISTUM23 (red) and BISTUM24 (blue). The respective Pearson's correlation coefficients  $r^2$  are higher for only "clear sky days compared to when solely "cloudy" days are considered.

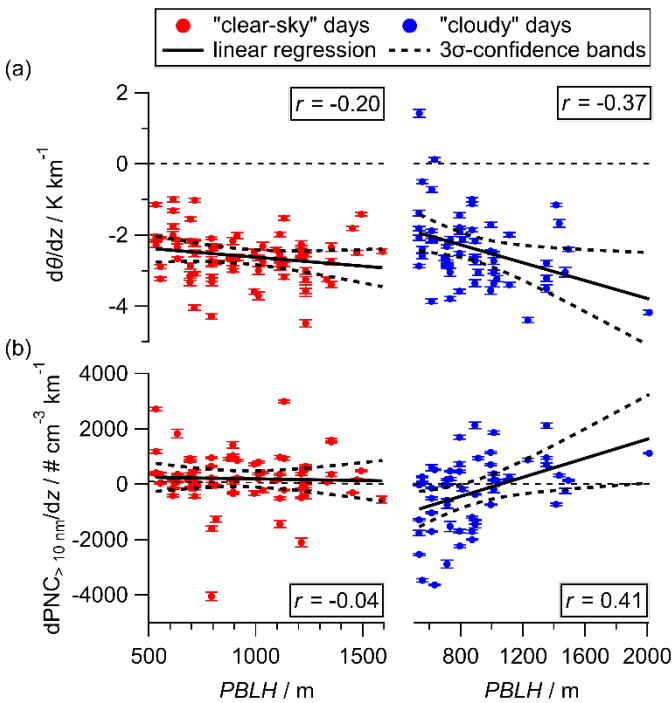

**Figure S8:** Gradients of the potential temperature  $\theta$  (a) and the particle number concentration  $\text{PNC}_{>10 \text{ nm}}$  (b) in the lowermost 500 m in a mixed PBL from both campaigns versus the non-logarithmic planetary boundary layer height (PBLH, in m). Linear regression and its  $3\sigma$ -confidence bands are depicted in solid and dotted lines.

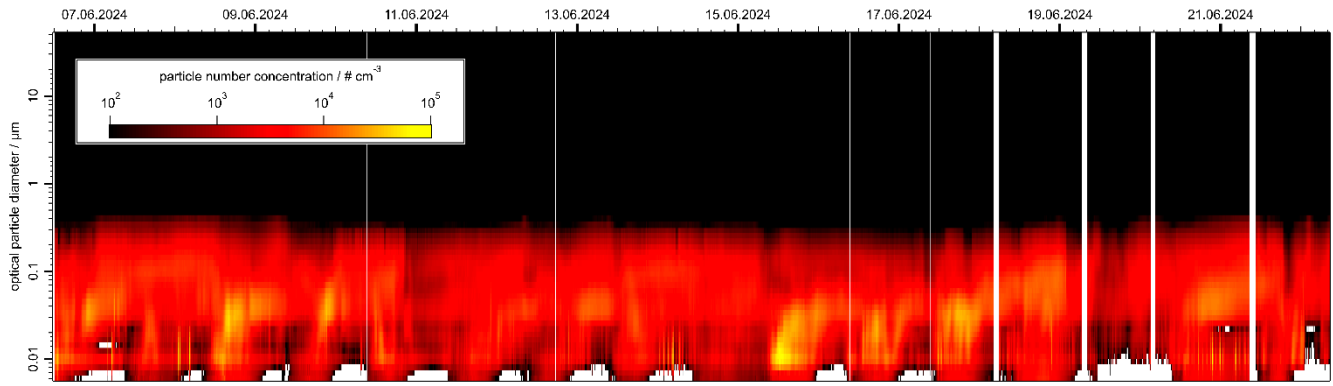

**Figure S9:** Throughout BISTUM24, the merged particle size distribution (described in Pikmann et al., 2024) shows new particle formation events almost daily. New particle formation is indicated by the growth of sub-10 nm particles after noon and is further described in Kulmala et al. (2004).

50

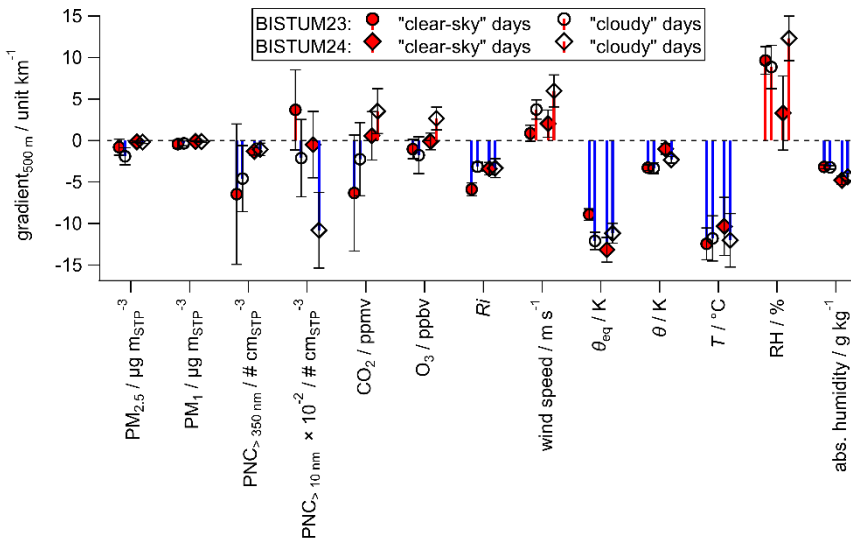

**Figure S10:** Vertical gradients in the lowermost 500 m in a mixed PBL for meteorological and trace matter variables during two campaigns (circles and diamonds) for “clear-sky” and “cloudy” days (red and white filled markers, respectively). Blue bars show negative, red bars positive gradients, and error bars represent the overall uncertainty, mainly due to day-to-day variability.

55

## References

- Drewnick, F., Böttger, T., von der Weiden-Reinmüller, S. L., Zorn, S. R., Klimach, T., Schneider, J., and Borrmann, S.: Design of a mobile aerosol research laboratory and data processing tools for effective stationary and mobile field measurements, *Atmospheric Measurement Techniques*, 5, 1443-1457, <https://doi.org/10.5194/amt-5-1443-2012>, 2012.
- 60 Kulmala, M., Vehkamäki, H., Petäjä, T., Dal Maso, M., Lauri, A., Kerminen, V. M., Birmili, W., and McMurry, P. H.: Formation and growth rates of ultrafine atmospheric particles: a review of observations, *Journal of Aerosol Science*, 35, 143-176, <https://doi.org/10.1016/j.jaerosci.2003.10.003>, 2004.
- Moormann, L., Böttger, T., Schuhmann, P., Valero, L., Fachinger, F., and Drewnick, F.: The Flying Laboratory FLab: development and application of a UAS to measure aerosol particles and trace gases in the lower troposphere, *Atmos. Meas. Tech.*, 18, 1441-1459, <https://doi.org/10.5194/amt-18-1441-2025>, 2025.
- 65 Pikmann, J., Drewnick, F., Fachinger, F., and Borrmann, S.: Particulate emissions from cooking: emission factors, emission dynamics, and mass spectrometric analysis for different cooking methods, *Atmos. Chem. Phys.*, 24, 12295-12321, <https://doi.org/10.5194/acp-24-12295-2024>, 2024.
